# Supplementary material for: Water dispersible Eu3+-doped NaGd(SO4)2·H2O nanorods for selective Fe3+ sensing applications
Source: Royal Society of Chemistry journal article supplement (doi:10.1039/c3ra41343h), 2013-01-01
Supplement: c3ra41343h.pdf [file c3ra41343h.pdf]

## Supplementary Information

# Water dispersible Eu<sup>3+</sup>-doped NaGd(SO<sub>4</sub>)<sub>2</sub>·H<sub>2</sub>O nanorods for selective Fe<sup>3+</sup> sensing applications

Chanchal Hazra<sup>a</sup> and Venkataramanan Mahalingam<sup>a\*</sup>

<sup>a</sup>*Department of Chemical Sciences, Indian Institute of Science Education and Research (IISER), Kolkata, Mohanpur, West Bengal, India*

### EXPERIMENTAL SECTION

**Materials:** Gd<sub>2</sub>O<sub>3</sub>, Eu<sub>2</sub>O<sub>3</sub> (99.99%, from Aldrich), ethylene glycol (from Merck), Polyacrylic acid (800 M.W. from Aldrich), H<sub>2</sub>SO<sub>4</sub> (98% pure from Merck), NaOH pellet (from Merck) were used for the synthesis. All chemicals were used as received without further purification.

**Synthesis:** Poly(acrylic acid) coated NaGd(SO<sub>4</sub>)<sub>2</sub>:Eu<sup>3+</sup> (x%) nanorods [x = 1, 2, 3, 5, 8, 10, 15] were synthesized by mixing gadolinium nitrate, europium nitrate, PAA and sulfuric acid in ethylene glycol medium. Briefly, Gd(NO<sub>3</sub>)<sub>3</sub> (1.90 mmol, 857.6 mg) and Eu(NO<sub>3</sub>)<sub>3</sub> (0.10 mmol, 42.81 mg) were added to 5 ml ethylene glycol under magnetic stirring. H<sub>2</sub>SO<sub>4</sub> (4 mmol, 2 ml H<sub>2</sub>SO<sub>4</sub> / 8 ml EG) was then added as sulphate source, and the solution was stirred vigorously for about 20 min. Sodium hydroxide (NaOH) pellets (150 mg) were directly added to the solution. Once NaOH was completely dissolved, 0.2g PAA was added to the mixture and the stirring was maintained for another 20 min. Subsequently the colloidal solution was transferred to a 30 ml vial used for microwave synthesis (Anton Parr Monowave 300 microwave reactor under temperature control mode). The vial was tightly sealed with Teflon cap and then microwave heated at 120° C for 5 minutes. The final product appeared as precipitate was collected by centrifugation and washed thrice with ethanol, followed by deionized water to remove any unreacted reactants.

**XRD measurements:** The XRD patterns were collected using the Rigaku-SmartLab diffractometer attached with D/tex ultra detector and Cu K<sub>α</sub> source operating at 50 mA and 40 kV. Scan range was set from 10-70° 2θ with a step size of 0.02° with a count time of 2 sec. The samples were well powdered and spread evenly on a quartz slide.

**Transmission electron microscopy measurements:** TEM images were taken on a UHR-FEG-TEM, JEOL; JEM 2100 F model using a 200 kV electron source. Samples were prepared by placing a drop of aqueous dispersion of the nanorods on a carbon coated copper grid and the grid was dried under air.

**Thermogravimetric analysis:** Thermogravimetric analysis was performed using Mettler Toledo TGA 851 instrument under N<sub>2</sub> atmosphere at a heating rate of 10° min<sup>-1</sup>.

**Photoluminescence measurements:** The photoluminescence spectra were measured on a Horiba Jobin Yvon spectrometer equipped with 150 W Xe lamp. The excitation and emission light were dispersed using Czerny-Turner monochromator with an optical resolution of 1 nm. The emitted photons were detected using a Hamamatsu R928 detector. The output signal was recorded using a computer. The luminescence lifetime measurements were performed with the Horiba Jobin Yvon Fluoromax-4 CP machine equipped with a pulsed Xe source operating at 25 W.

|                                    | Mean (mV)            | Area (%) | Width (mV) |
|------------------------------------|----------------------|----------|------------|
| <b>Zeta Potential (mV): -4.47</b>  | <b>Peak 1: -4.47</b> | 100.0    | 4.69       |
| <b>Zeta Deviation (mV): 4.69</b>   | <b>Peak 2: 0.00</b>  | 0.0      | 0.00       |
| <b>Conductivity (mS/cm): 0.867</b> | <b>Peak 3: 0.00</b>  | 0.0      | 0.00       |

Result quality : **Good**

### Eu-doped NaGd(SO<sub>4</sub>)<sub>2</sub> nanorods

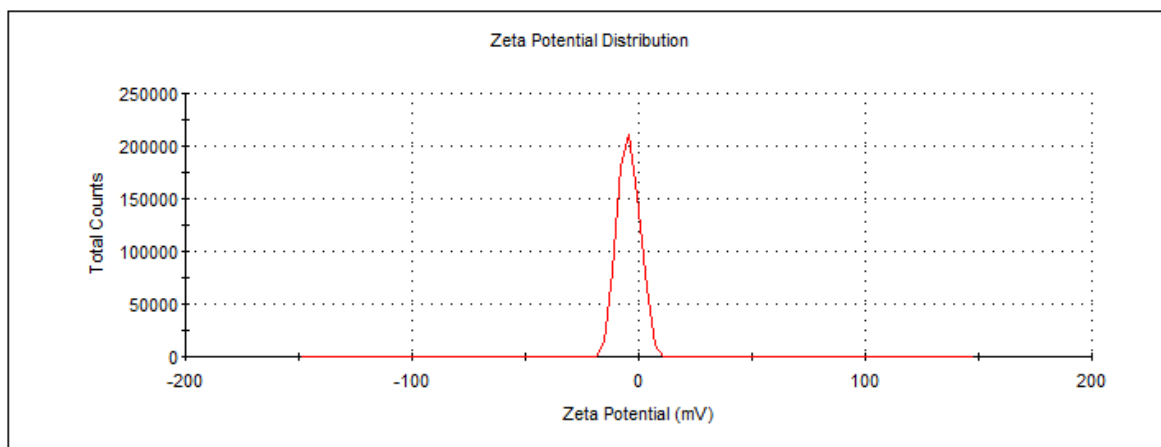

|                                    | Mean (mV)            | Area (%) | Width (mV) |
|------------------------------------|----------------------|----------|------------|
| <b>Zeta Potential (mV): -18.4</b>  | <b>Peak 1: -18.4</b> | 100.0    | 7.35       |
| <b>Zeta Deviation (mV): 7.35</b>   | <b>Peak 2: 0.00</b>  | 0.0      | 0.00       |
| <b>Conductivity (mS/cm): 0.221</b> | <b>Peak 3: 0.00</b>  | 0.0      | 0.00       |

Result quality : **Good**

### Poly(acrylic acid)

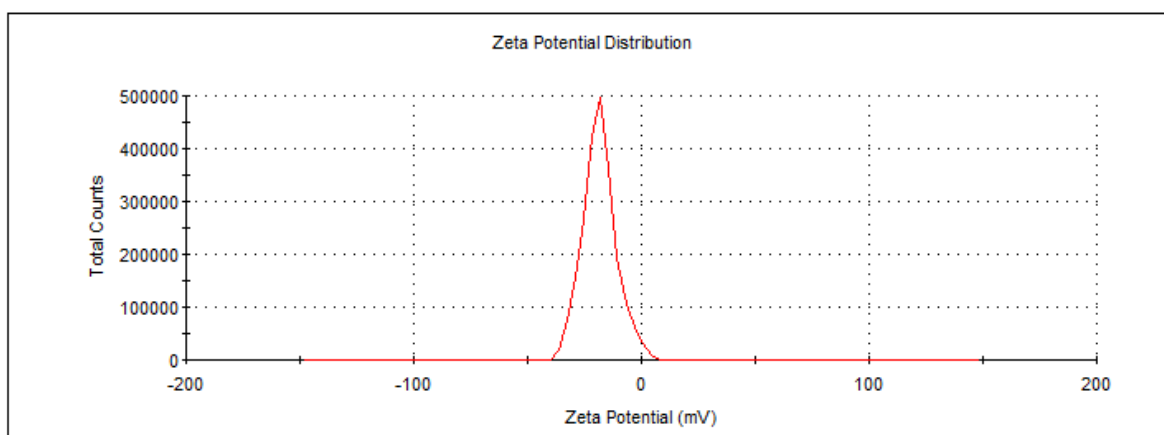

Fig. S1. Zeta potential results for Eu<sup>3+</sup>-doped NaGd(SO<sub>4</sub>)<sub>2</sub> nanorods and poly(acrylic acid).

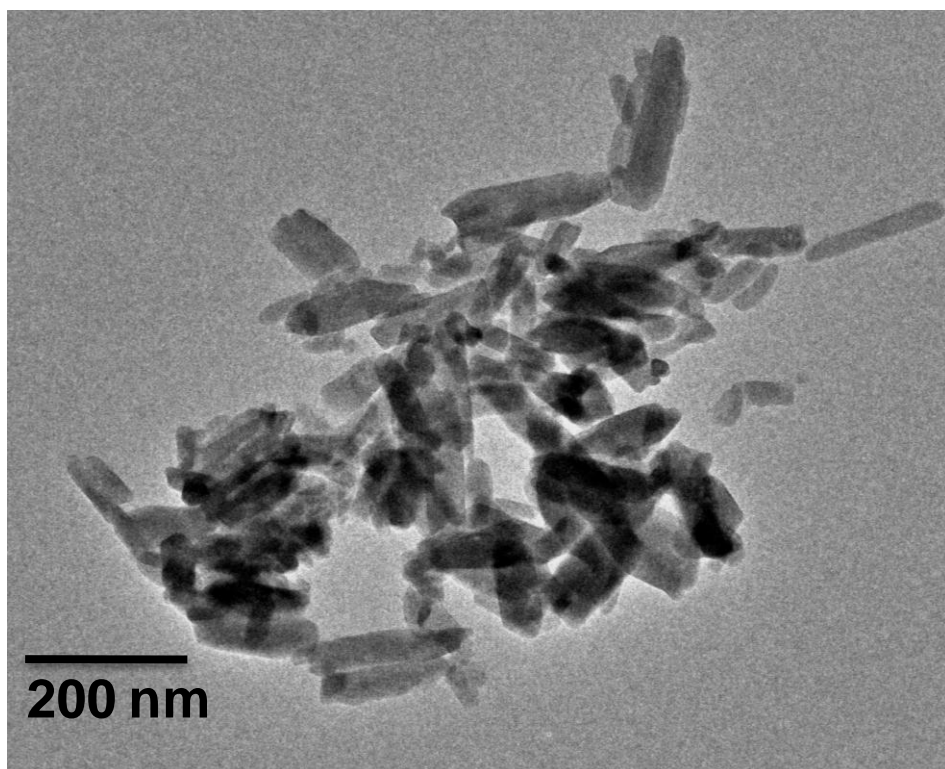

Fig. S2 TEM image of the PAA coated  $\text{Eu}^{3+}$ -doped  $\text{NaGd}(\text{SO}_4)_2$  nanorods in water after diluting with  $\text{NH}_4\text{OH}$  to increase the pH.

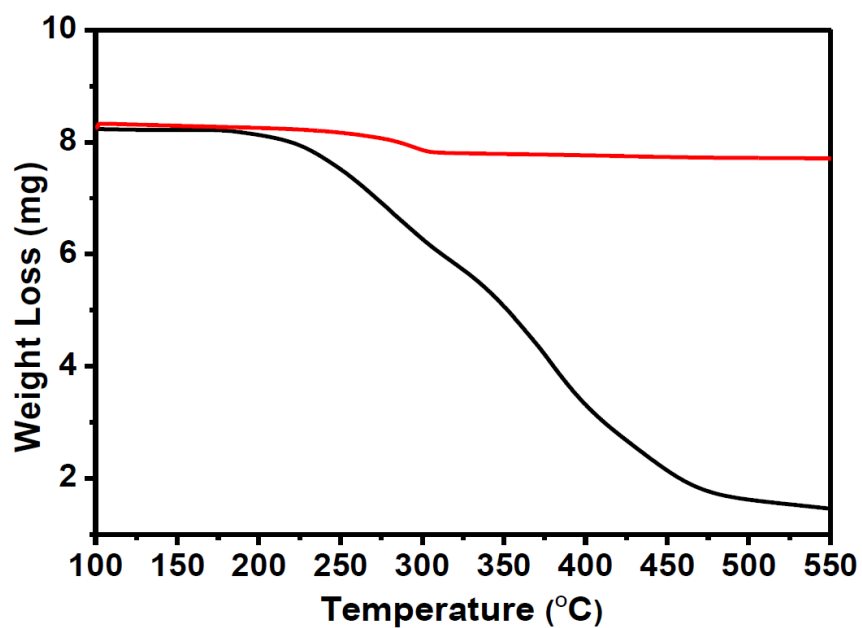

**Fig. S3** TGA curves for free PAA (black) and PAA coated  $\text{Eu}^{3+}$ -doped  $\text{NaGd}(\text{SO}_4)_2$  (red)

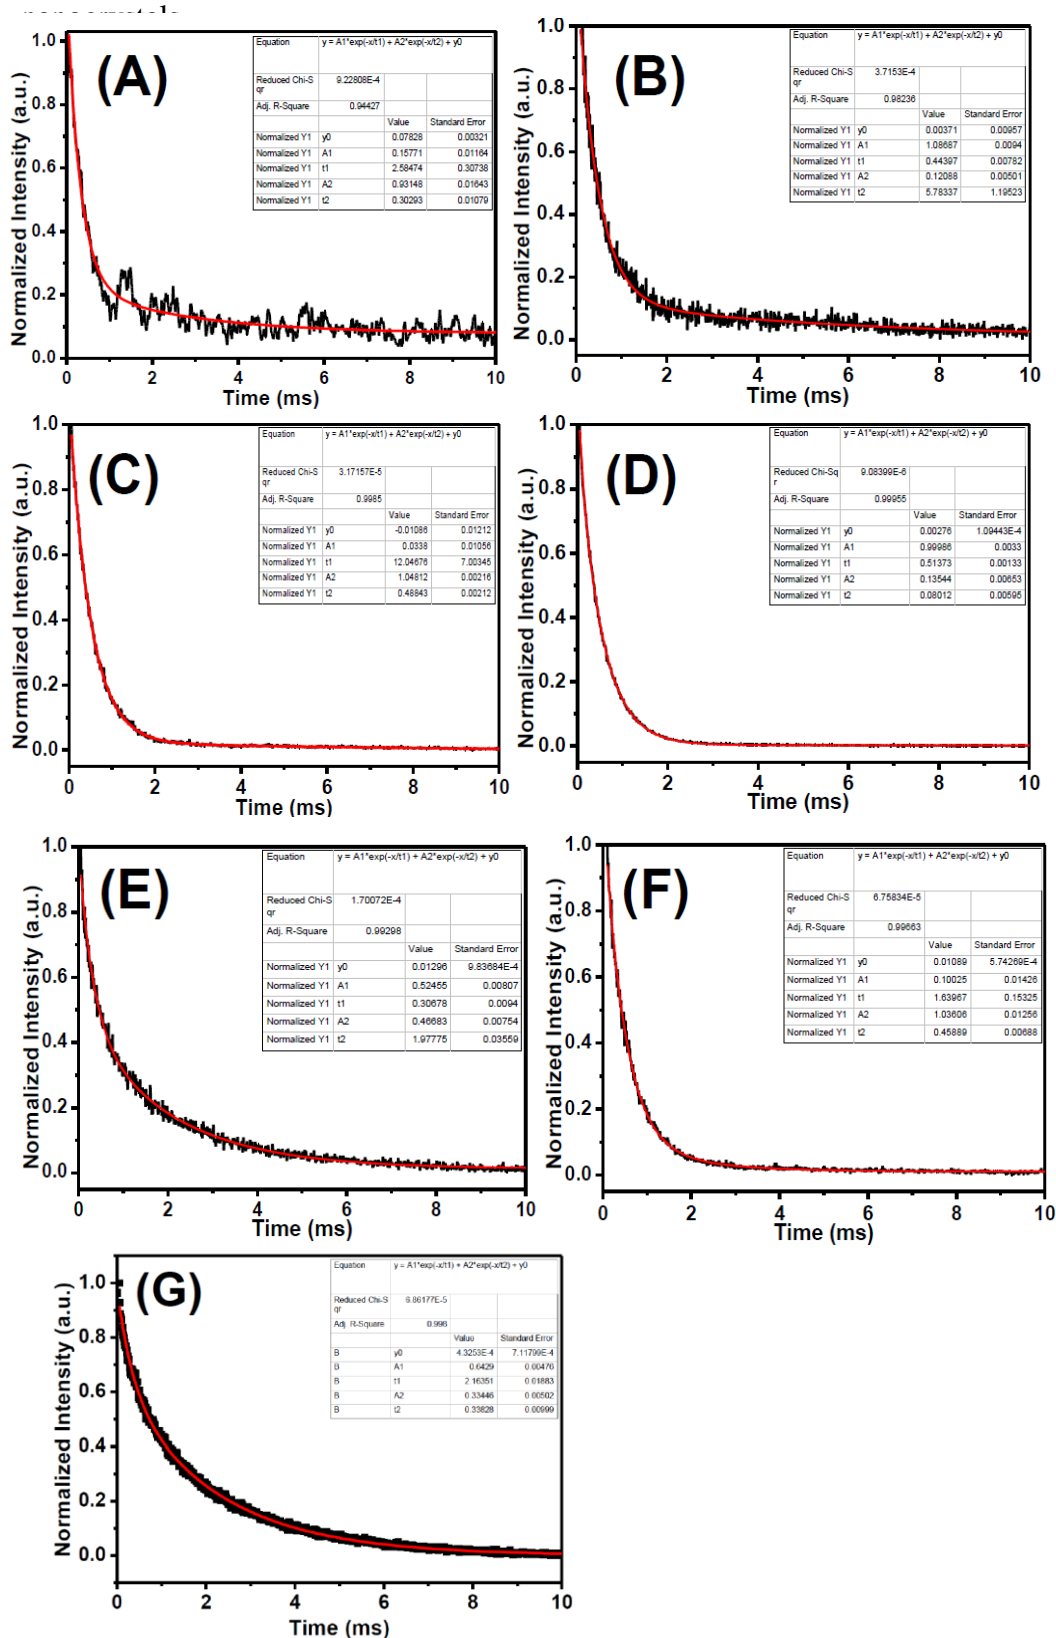

**Fig. S4** Photoluminescence decay curve of  $\text{Eu}^{3+}$  ion in  $x$  mol%  $\text{Eu}^{3+}$ -doped  $\text{NaGd}(\text{SO}_4)_2$  nanocrystals. [ $x = 1\%$  (A),  $2\%$  (B),  $3\%$  (C),  $5\%$  (D),  $10\%$  (E),  $15\%$  (F),  $8\%$  (G)].

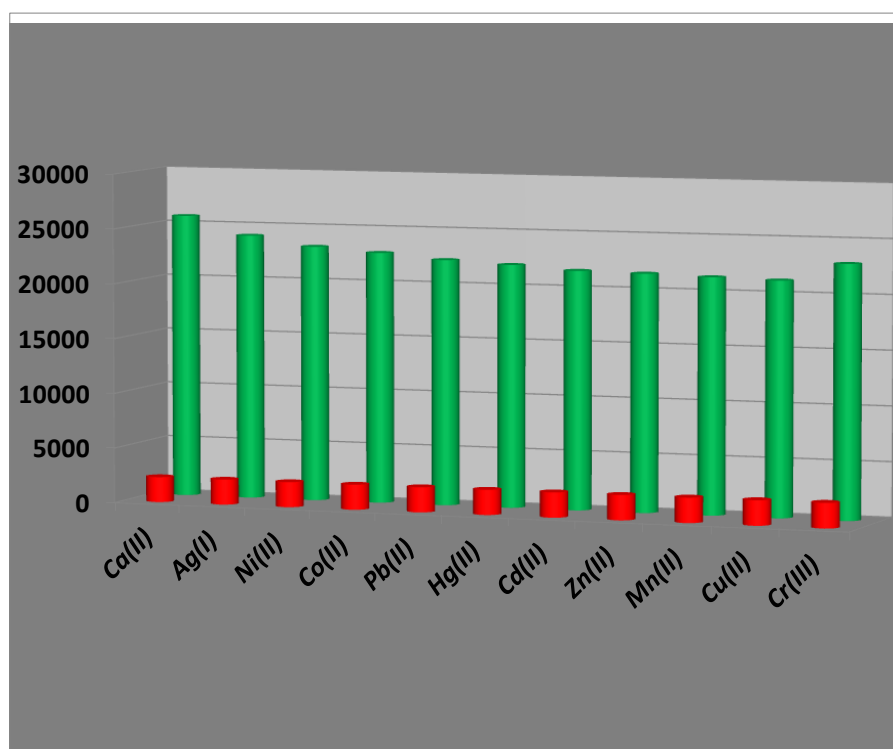

**Fig. S5.** The bar diagram indicating the selective quenching of  $\text{Eu}^{3+}$  luminescence intensity for  $\text{Fe}^{3+}$  adsorption in the presence of various metal ions.

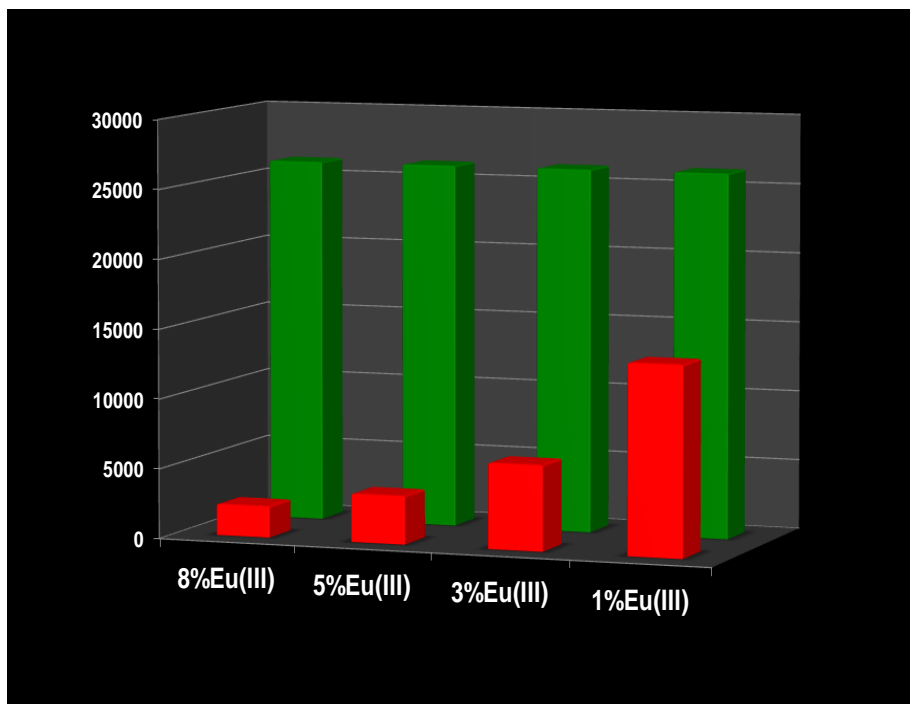

**Fig. S6** Plot of normalized  $\text{Eu}^{3+}$  emission intensity Vs time for 5 and 8 mol%  $\text{Eu}^{3+}$  -doped  $\text{NaGd}(\text{SO}_4)_2$  nanorods after adding aqueous iron salt solution [ $10^{-4}(\text{M})$ ] to both.



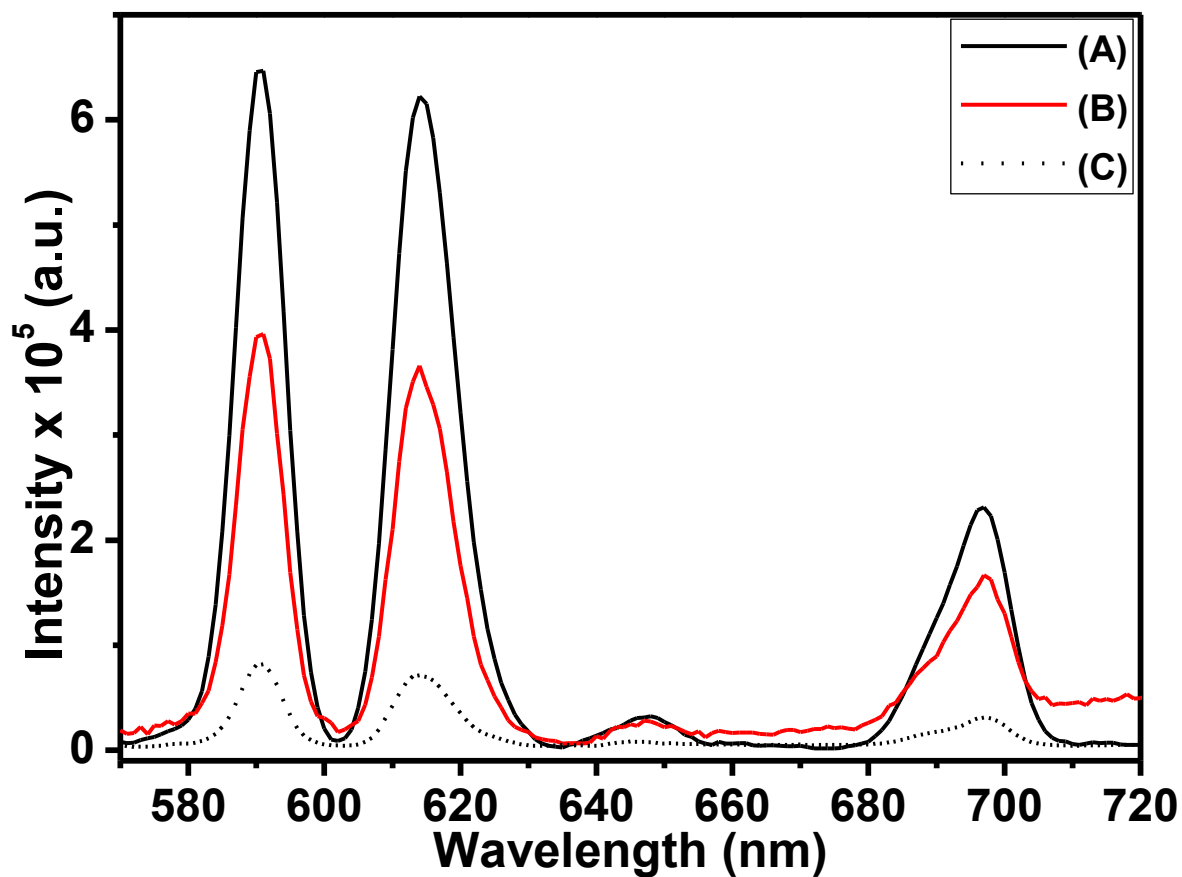

**Fig. S7** Emission spectra of (A) Eu-doped NaGd(SO<sub>4</sub>)<sub>2</sub> nanorods (B) after addition of a mixture containing  $6 \times 10^{-4}$  M Fe<sup>3+</sup> solution and  $25 \times 10^{-4}$  M CH<sub>3</sub>COOH (C) addition of  $6 \times 10^{-4}$  M Fe<sup>3+</sup> solution.

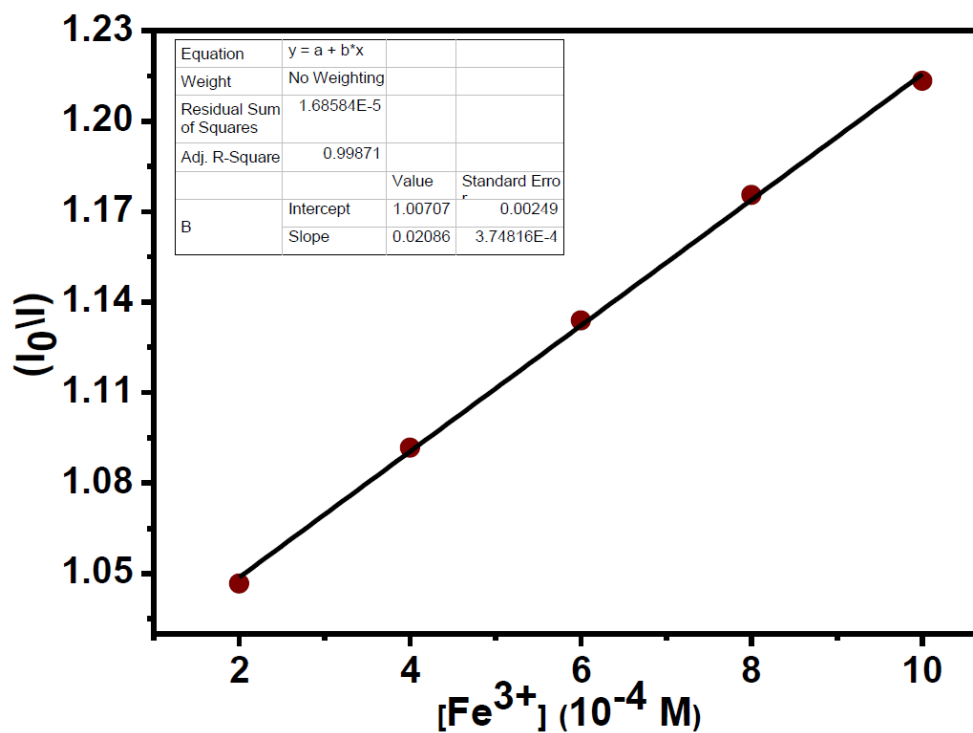

**Fig. S8** Stern-Volmer plot of  $I_0/I$  Vs  $Fe^{3+}$  concentration showing the linear dependence indicating the dynamic nature of the quenching.

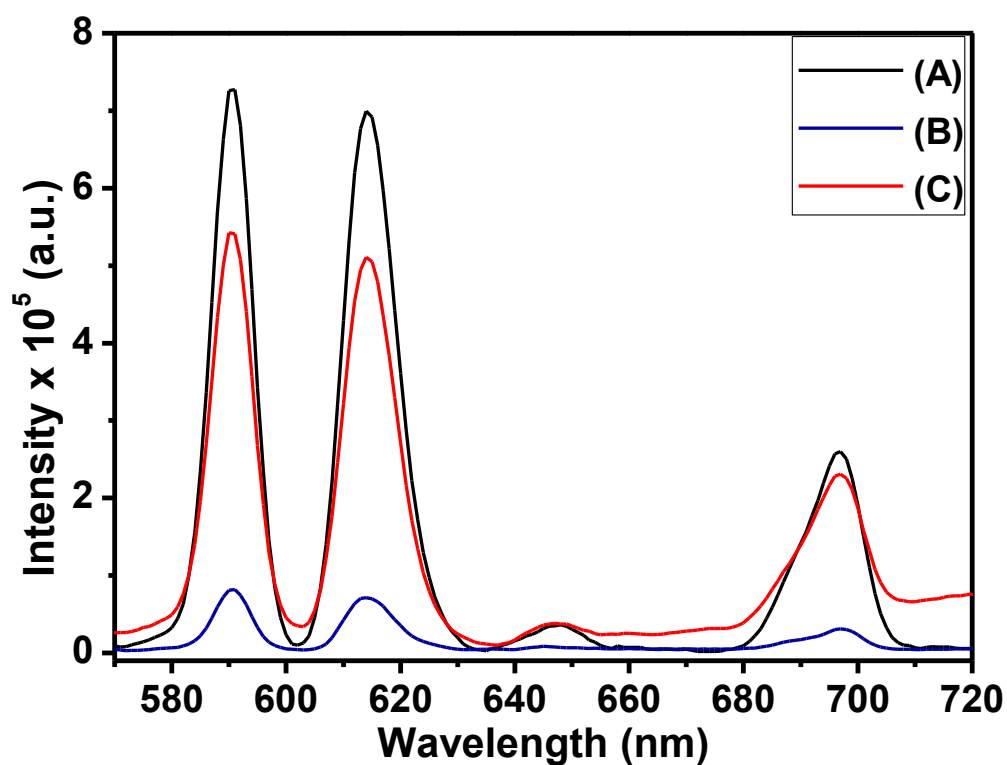

**Fig. S9** Photoluminescence of (A) 8 mol% Eu<sup>3+</sup>-doped NaGd(SO<sub>4</sub>)<sub>2</sub> nanorods (B) same after addition of 6 × 10<sup>-4</sup> M Fe<sup>3+</sup> solution (C) recovery of Eu<sup>3+</sup> luminescence after addition of 50 × 10<sup>-4</sup> M PAA to Fe<sup>3+</sup>-complexed nanorods.
